# Supplementary material
Source: PubMed Central journal article supplement (PMC5829796)
Supplement: AJSLP-16-0155preston_SuppS4.pdf [file AJSLP-16-0155preston_SuppS4.pdf]

**Supplemental Material S4.** Individual within-session practice trial data in two treatment conditions.

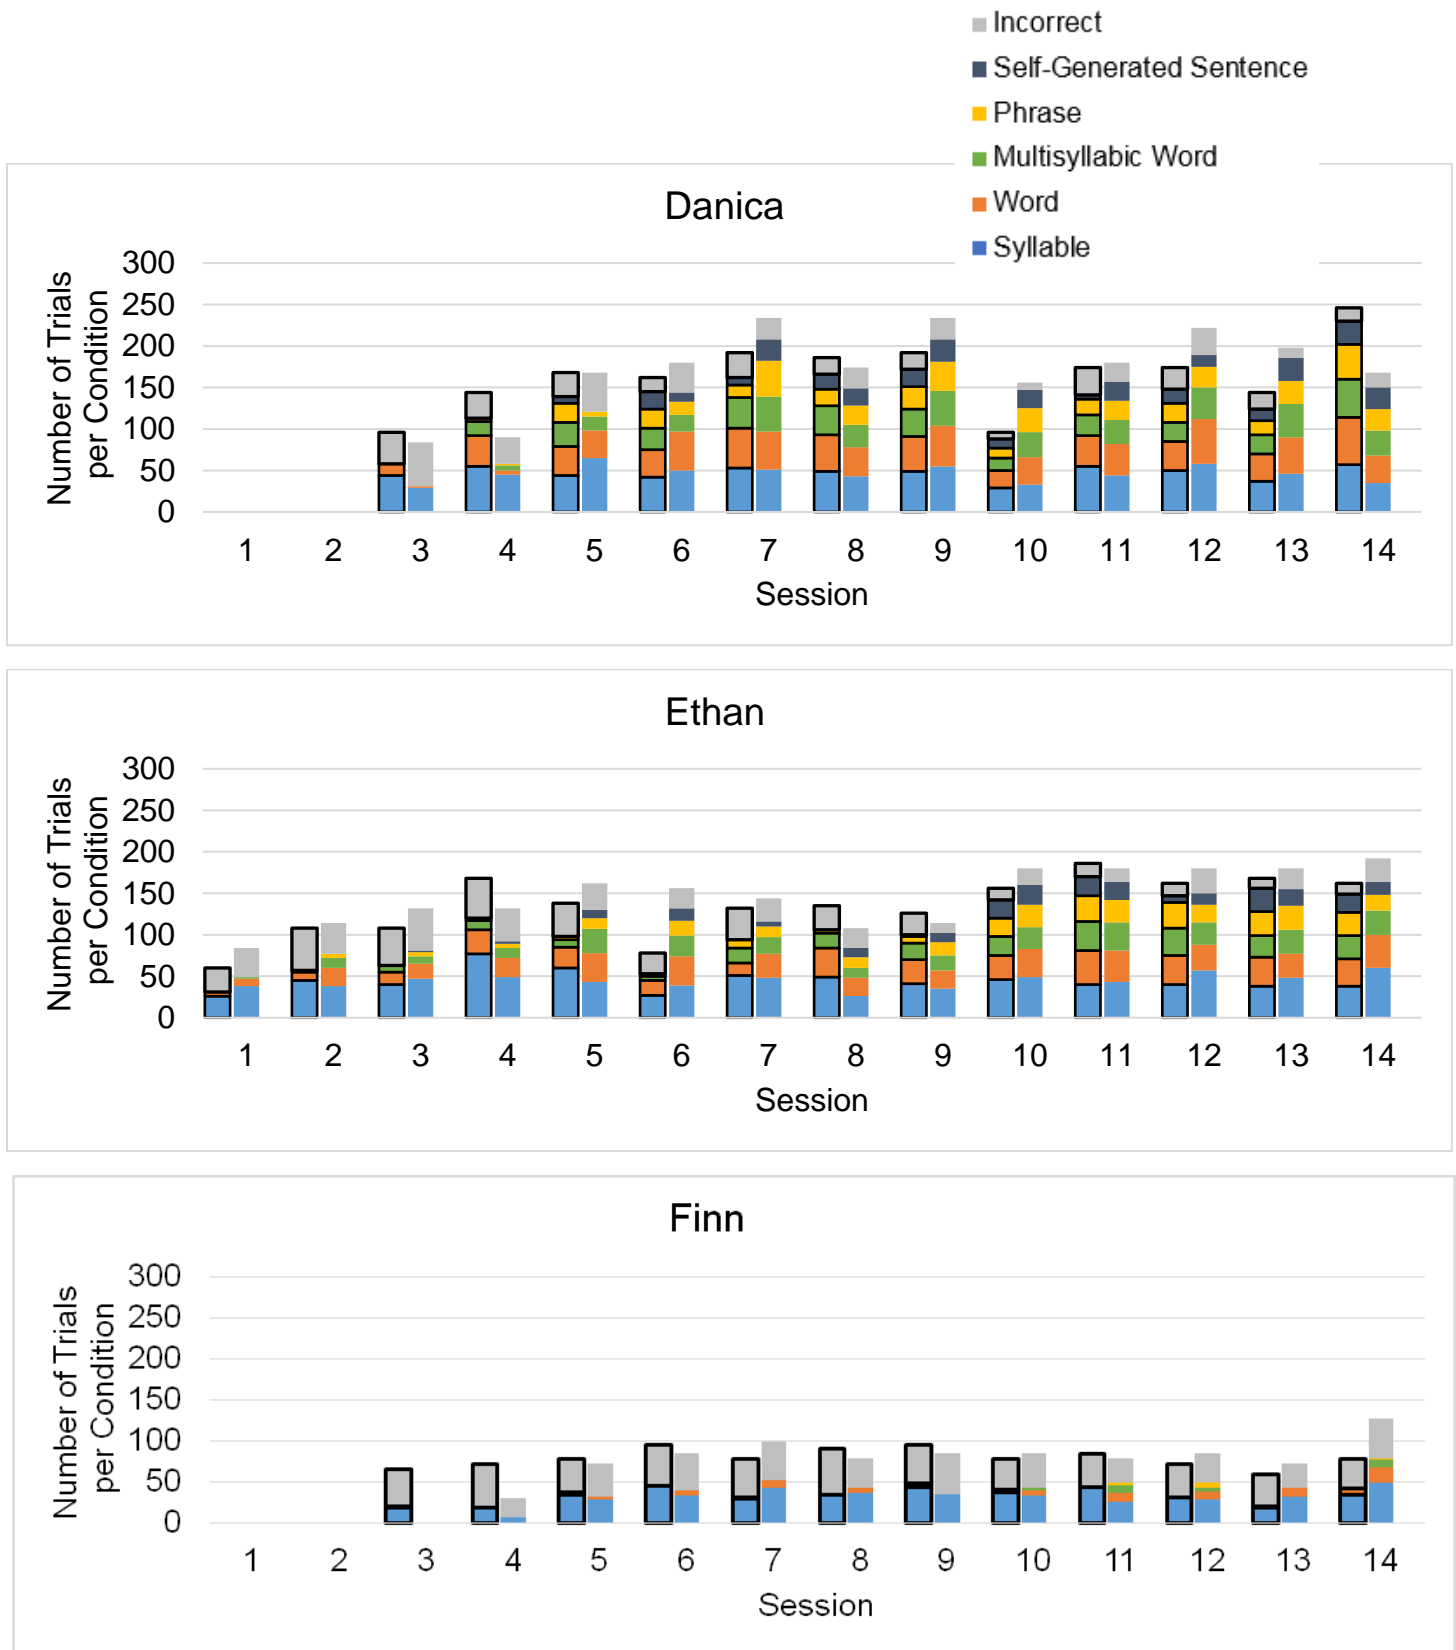

*Note.* The first column of each session (outlined in black) represents number of trials in the prosodic variation (PROS) condition and the second column represents the number of trials in the no-prosodic variation (NoPROS) condition.

**Supplemental Material S4.** Individual within-session practice trial data in two treatment conditions.

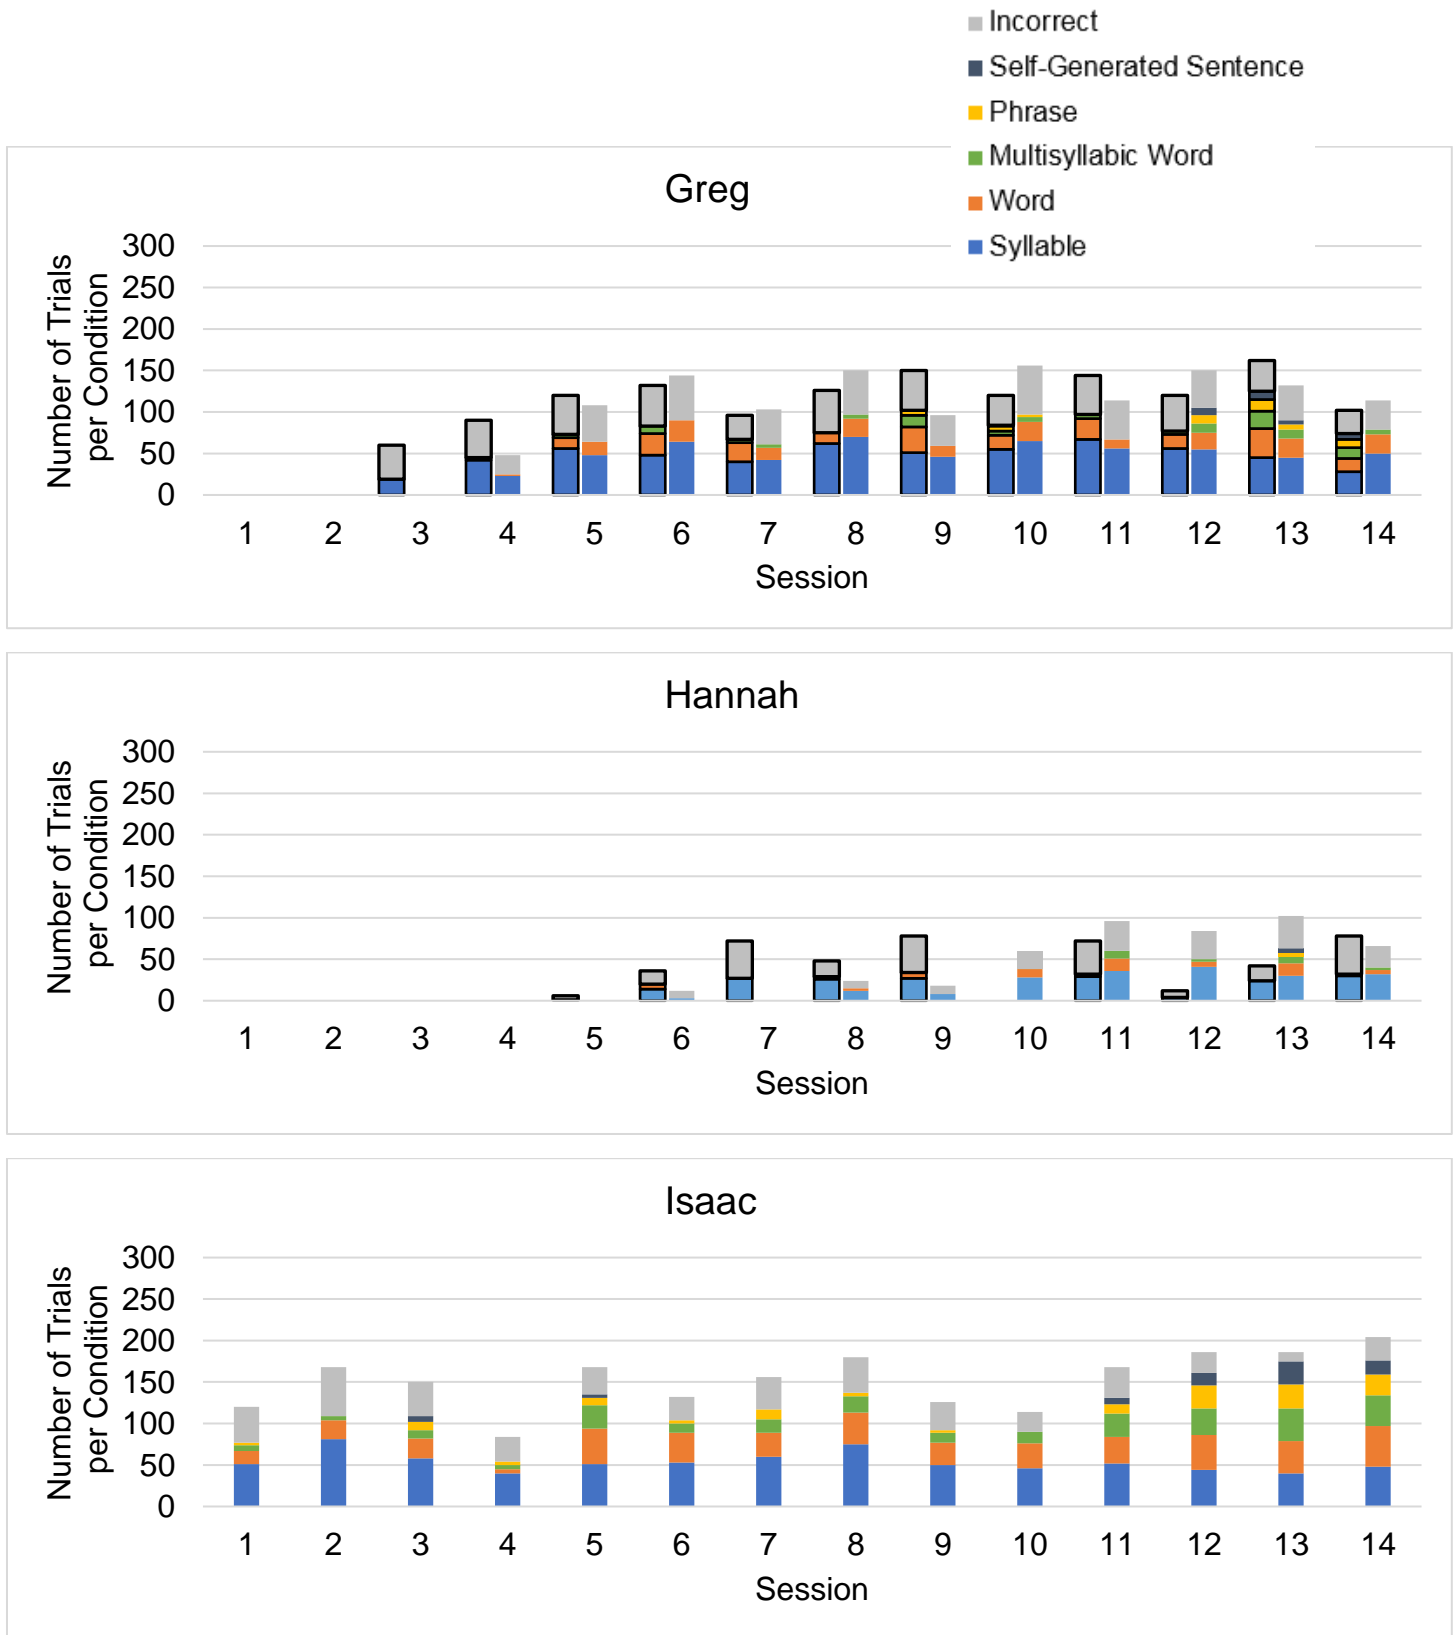

*Note.* The first column of each session (outlined in black) represents number of trials in the prosodic variation (PROS) condition and the second column represents the number of trials in the no-prosodic variation (NoPROS) condition.
